# Supplementary material
Source: MDPI journal article supplement (https://www.mdpi.com/1424-8247/15/6/666)
Supplement: s1 [file s1]

# Supplementary Materials for

## Synthesis, physicochemical, labeling and in vivo characterization of <sup>44</sup>Sc-labeled DO3AM-NI as a hypoxia sensitive PET probe

Dániel Szücs<sup>1, 2, 3</sup>, Tibor Csupász<sup>2,3</sup>, Judit P. Szabó<sup>1, 4</sup>, Adrienn Kis<sup>1</sup>, Barbara Gyuricza<sup>1, 3</sup>, Viktória Arató<sup>1, 5</sup>, Viktória Forgács<sup>1, 3</sup>, Adrienn Vágner<sup>6</sup>, Gábor Nagy<sup>6</sup>, Ildikó Garai<sup>1, 6</sup>, Dezső Szikra<sup>1, 6</sup>, Imre Tóth<sup>2</sup>, György Trencsényi<sup>1, 6</sup>, Gyula Tircsó<sup>2</sup> and Anikó Fekete<sup>1, \*</sup>

<sup>1</sup> Division of Nuclear Medicine and Translational Imaging, Department of Medical Imaging, Faculty of Medicine, University of Debrecen, Nagyerdei krt. 98., H-4032 Debrecen, Hungary; [szucs.daniel@science.unideb.hu](mailto:szucs.daniel@science.unideb.hu) (D.S.); [szabo.judit@med.unideb.hu](mailto:szabo.judit@med.unideb.hu) (J.P.S.); [kis.adrienn@med.unideb.hu](mailto:kis.adrienn@med.unideb.hu) (A.K.); [gyuricza.barbara@med.unideb.hu](mailto:gyuricza.barbara@med.unideb.hu) (B.G.); [arato.viktoria@med.unideb.hu](mailto:arato.viktoria@med.unideb.hu) (V.A.); [forgacs.viktoria@med.unideb.hu](mailto:forgacs.viktoria@med.unideb.hu) (V.F.); [garai.ildiko@med.unideb.hu](mailto:garai.ildiko@med.unideb.hu) (I.G.); [szikra.dezso@med.unideb.hu](mailto:szikra.dezso@med.unideb.hu) (D.S.); [trencsenyi.gyorgy@med.unideb.hu](mailto:trencsenyi.gyorgy@med.unideb.hu) (G.T.); [fekete.aniko@science.unideb.hu](mailto:fekete.aniko@science.unideb.hu) (A.F.).

<sup>2</sup> Department of Physical Chemistry, Faculty of Science and Technology, University of Debrecen, Egyetem tér 1, H-4032 Debrecen, Hungary; [csupasz.tibor@science.unideb.hu](mailto:csupasz.tibor@science.unideb.hu) (T.C.); [imre.toth@science.unideb.hu](mailto:imre.toth@science.unideb.hu) (I.T.); [gyula.tircso@science.unideb.hu](mailto:gyula.tircso@science.unideb.hu) (G.T.).

<sup>3</sup> Doctoral School of Chemistry, Faculty of Science and Technology, University of Debrecen, Egyetem tér 1., H-4032 Debrecen, Hungary;

<sup>4</sup> Doctoral School of Clinical Medicine, Faculty of Medicine, University of Debrecen, Nagyerdei krt. 98., H-4032 Debrecen, Hungary;

<sup>5</sup> Doctoral School of Pharmaceutical Sciences, Faculty of Pharmacy, University of Debrecen, Nagyerdei krt. 98., H-4032 Debrecen, Hungary;

<sup>6</sup> Scanomed Ltd., Nagyerdei krt. 98., H-4032 Debrecen, Hungary; [vagner.adrienn@scanomed.hu](mailto:vagner.adrienn@scanomed.hu) (A.V.); [nagy.gabor@scanomed.hu](mailto:nagy.gabor@scanomed.hu) (G.N.).

\* Correspondence: [fekete.aniko@science.unideb.hu](mailto:fekete.aniko@science.unideb.hu) (A.F.); Tel.: +36-52-255-510 (ext. 54470)

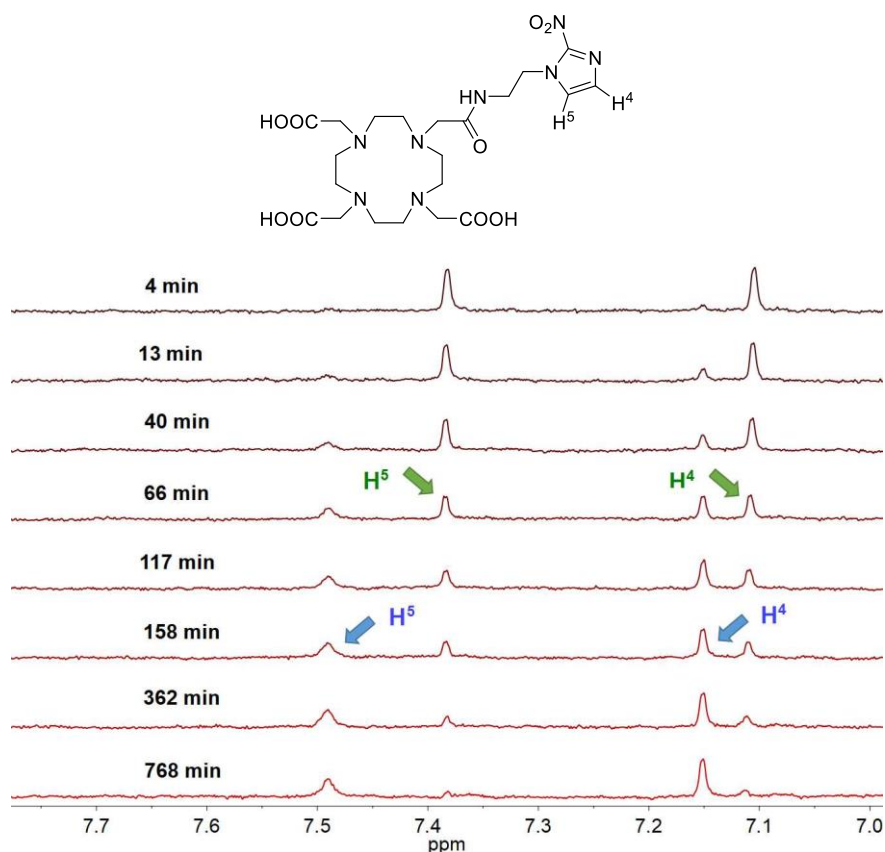

**Figure S1.** Aromatic region of the  $^1\text{H}$ -NMR spectra of the samples used to probe the formation rate of Sc(DO3AM-NI) at pH = 1.52 ( $c_{\text{L}}=3.8$  mM;  $c_{\text{Sc}^{3+}}=4.9$  mM;  $I=0.15$  M; 25 °C). Green arrows show the  $^1\text{H}$ -NMR peaks of the ligand and blue arrows show the  $^1\text{H}$ -NMR peaks of the scandium complex.

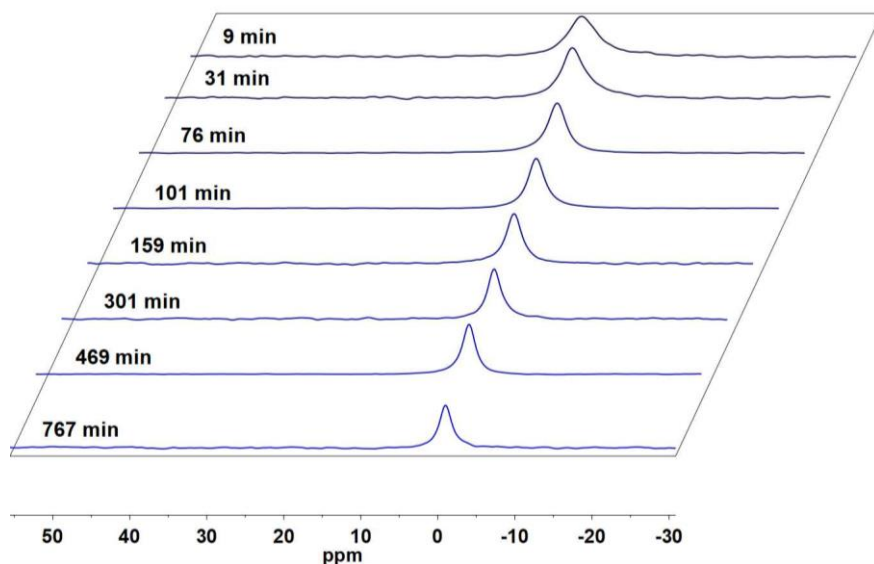

**Figure S2.** The  $^{45}\text{Sc}$ -NMR spectra obtained as a function of time for the Sc(DO3AM-NI) complex formation at pH = 1.52 ( $c_{\text{L}}=3.8$  mM;  $c_{\text{Sc}^{3+}}=4.9$  mM;  $I=0.15$  M; 25 °C) ( $\delta=+4.8$  –  $-0.7$  ppm). These spectra show just the free  $\text{Sc}^{3+}_{(\text{aq})}$  peaks, the signal of the scandium complex is out of this chemical shift range.

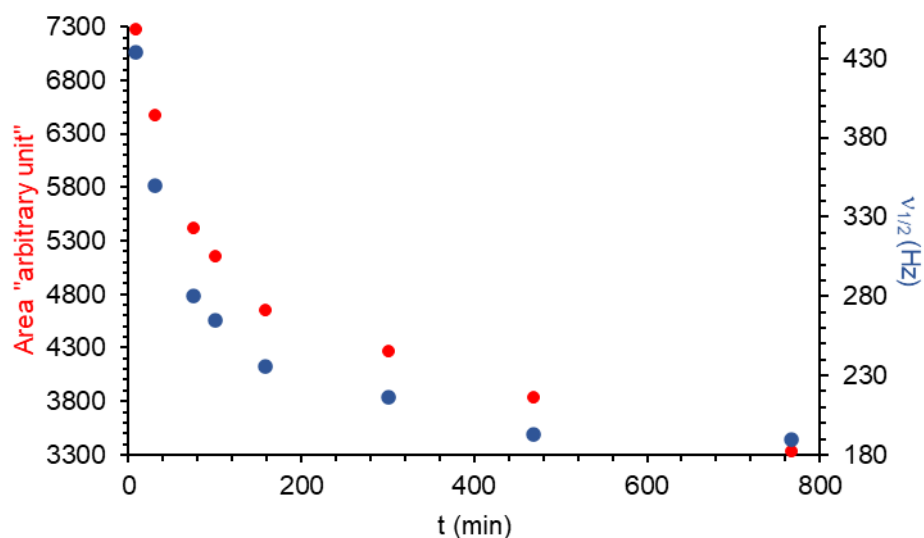

**Figure S3.** Peak area (●) and width (●) of the  $^{45}\text{Sc}$ -NMR signal corresponding to the free  $\text{Sc}^{3+}$  as a function of time for the formation of  $\text{Sc}(\text{DO3AM-NI})$  at  $\text{pH} = 1.52$  ( $c_{\text{L}}=3.8$  mM;  $c_{\text{Sc}^{3+}}=4.9$  mM;  $I=0.15$  M;  $25^\circ\text{C}$ ).

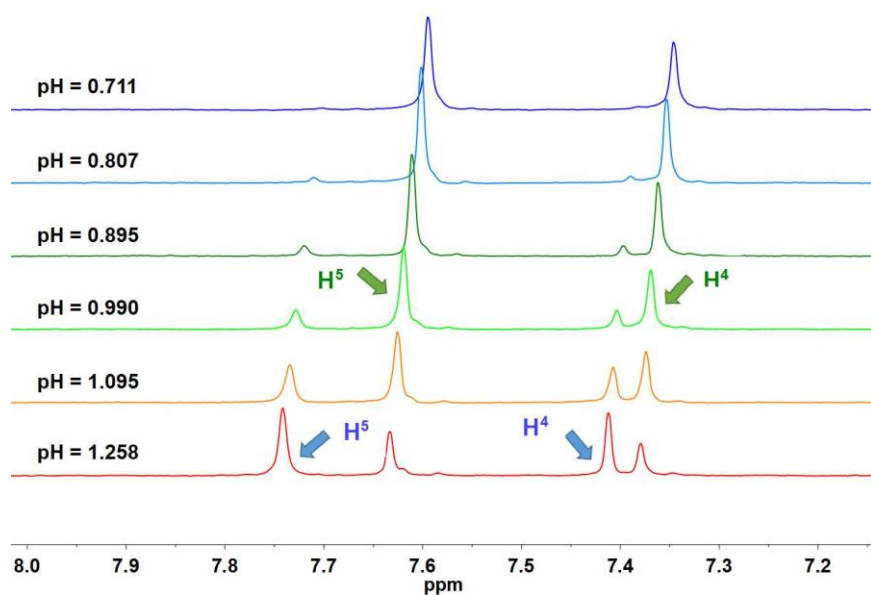

**Figure S4.** Aromatic region of the  $^1\text{H}$ -NMR spectra of the samples used for the determination of the  $\text{Sc}(\text{DO3AM-NI})$  complex ( $c_{\text{L}}=c_{\text{Sc}^{3+}}=3.2$  mM;  $I=0.15$  M;  $37^\circ\text{C}$ ). Green arrows show the  $^1\text{H}$ -NMR peaks of the ligand and blue arrows show the  $^1\text{H}$ -NMR peaks of the scandium complex.

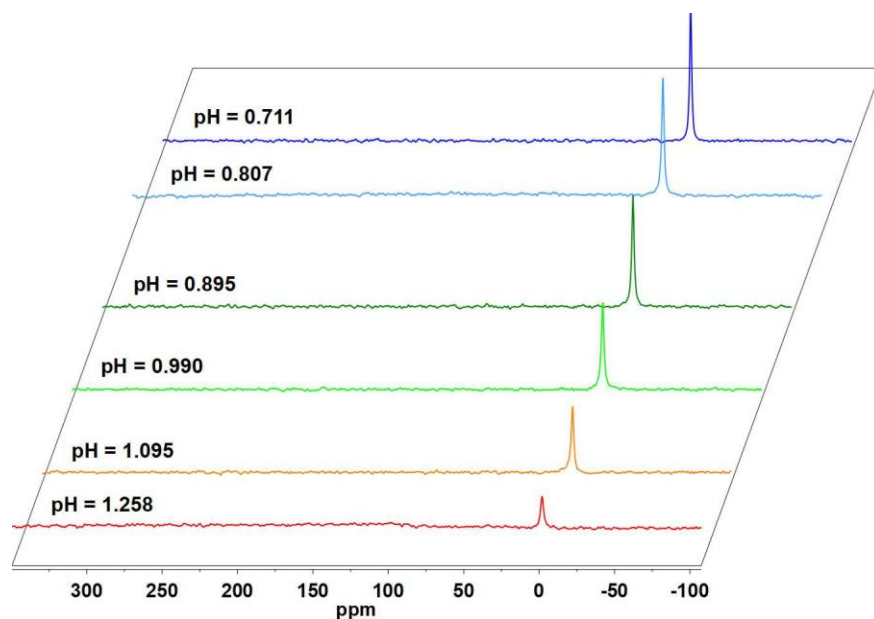

**Figure S5.**  $^{45}\text{Sc}$ -NMR spectra of the samples used for the determination of the Sc(DO3AM-NI) complex ( $c_{\text{L}}=c_{\text{Sc}^{3+}}=3.2 \text{ mM}$ ;  $I=0.15 \text{ M}$ ;  $37^\circ\text{C}$ ).

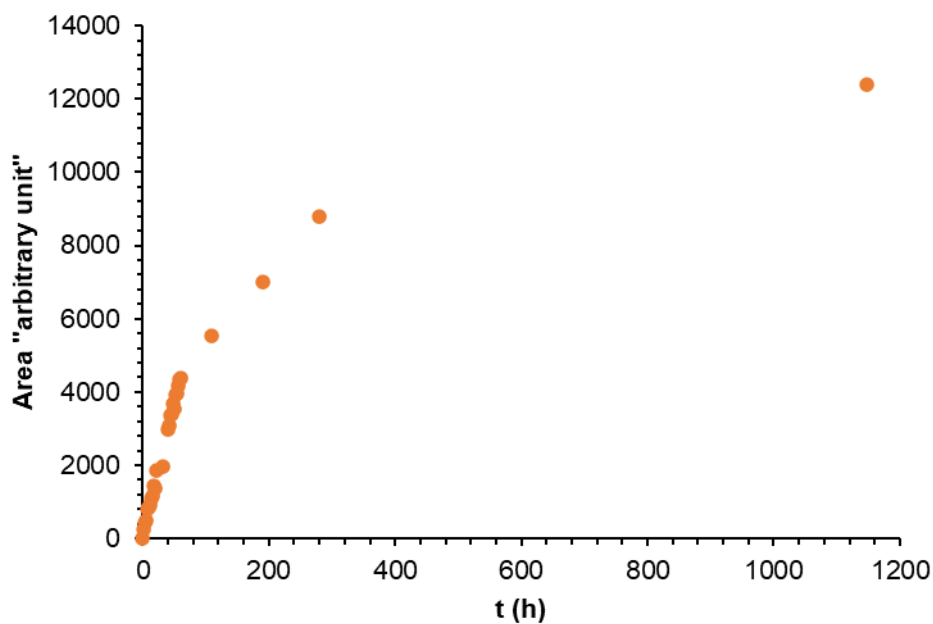

**Figure S6.** Peak area corresponding to the free Sc(III) as a function of time for the dissociation of Sc(DO3AM-NI) in 1.0 M HCl ( $c_{\text{complex}}=7.30 \text{ mM}$ ;  $I=1.03 \text{ M}$ ;  $25^\circ\text{C}$ ).

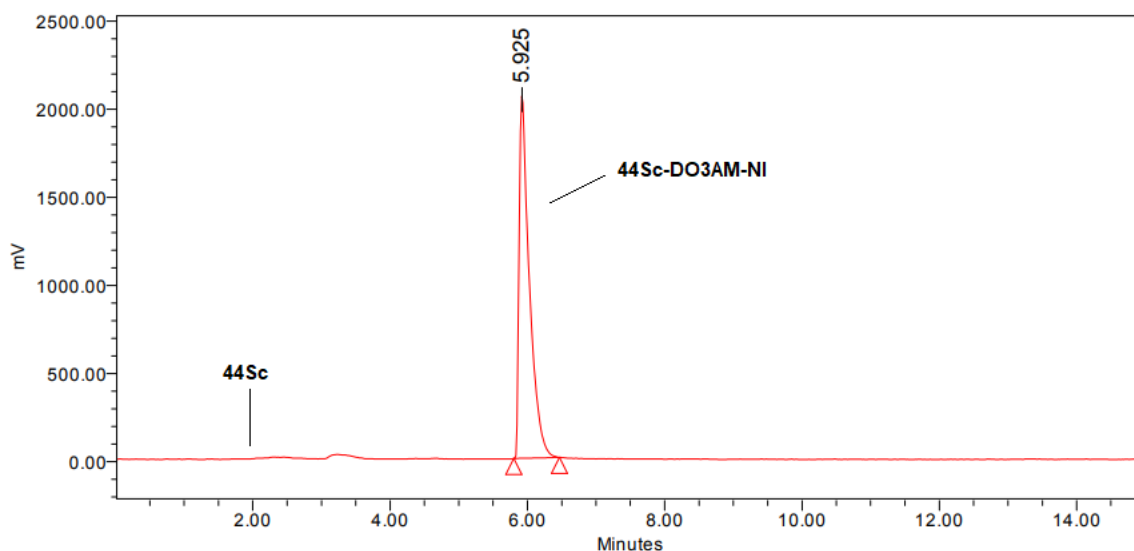

**Figure S7.** Radiochromatogram of purified  $[^{44}\text{Sc}]\text{Sc}(\text{DO3AM-NI})$ . Radio-HPLC was performed using a Luna C18 3  $\mu\text{m}$  (150 x 4.6 mm) column, solvent A: oxalic acid (0.01 M pH=3); solvent B: acetonitrile.

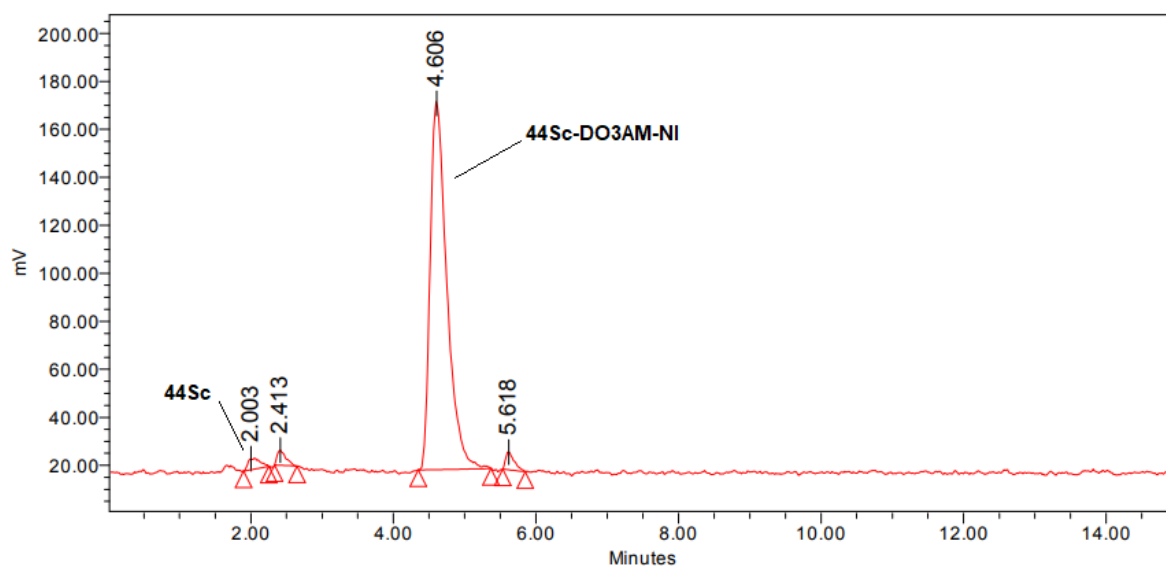

**Figure S8.** Radiochromatogram of the serum stability test of  $[^{44}\text{Sc}]\text{Sc}(\text{DO3AM-NI})$  at 240 min. Radio-HPLC was performed using a Kinetex C18 2.6  $\mu\text{m}$  (100 x 4.6 mm) column, solvent A: oxalic acid (0.01 M pH=3); solvent B: acetonitrile.
